# Supplementary material for: Structural Basis for the Assembly of Amyloid Fibrils by the Master Cell-Signaling Regulator Human Receptor-Interacting Protein Kinase 1
Source: Research Square preprint supplement (doi:10.21203/rs.3.rs-5820237/v1), 2025-01-24
Supplement: Supplementary file 1 [file 7a79b4ab0ac8eceaa7480dc0.xlsx]

## Sheet: Sheet1
		Human RIPK1
		(EMDB-52356)
		(PDB 9HR6)
	Data collection and processing
	Magnification	165000
	Voltage (kV)	300
	Electron exposure (e–/Å2)	49.3
	Defocus range (μm)	0.8-1.6
	Pixel size (Å)	0.5054
	Axial symmetry	C1
	Twist (degree)	-7319
	Rise (Å)	4667
	Initial segment images (no.)	2814672
	Final segment images (no.)	460173
	Map resolution (Å)	2.57
	FSC threshold	0.143
	Map resolution range (Å)	2.32-2.86
	Refinement
	Initial model used	In silico (ModelAngelo)
	Model resolution (Å)	2.57
	FSC threshold	0.143
	Model resolution range (Å)	2.32-2.86
	Map sharpening B factor (Å2)	-57.4
	Model composition
	Non-hydrogen atoms	930
	Protein residues	120
	Ligands	0
	B factor (Å2)	65.70
	R.M.S. deviations
	Bond lengths (Å)	0.004
	Bond angles (°)	0.789
	Validation
	MolProbity score	0.82
	Clashscore	0
	Poor rotamers (%)	0
	Ramachandran plot
	Favored (%)	95.45
	Allowed (%)	4.55
	Disallowed (%)	0.00
