# Supplementary material for: Structural Basis for the Assembly of Amyloid Fibrils by the Master Cell-Signaling Regulator Human Receptor-Interacting Protein Kinase 1
Source: Research Square preprint supplement (doi:10.21203/rs.3.rs-5820237/v1), 2025-01-24
Supplement: Supplementary file 2 [file a40ed725249ea3e2a34b42e8.xlsx]

## Sheet: Sheet1
	14.1 T (600 MHz 1H frequency), 3.2 mm HCN CPMAS CryoProbe
	Experiment	NS	MAS (kHz)	d1 (s)	Acq time (ms)	Sweep width (kHz)	Dec power (kHz)	Mixing (ms)	CP time (ms)	Field Strength (kHz)	Sample T (K)
	2D NCA	8	14	2	t2: 15; t1: 11	w2: 52.6; w1: 2.8	100	-	HN: 1.00; NC: 1.50	H: 54; N: 40 (transfer 1); N: 4; CA: 18 (transfer 2)	315
	2D NCACX	8	14	2	t3: 15.0; t1: 7.9	w3: 52.6; w2: 3.5; w1: 2.8	100	50	HN: 1.00; NC: 1.50	H: 54; N: 40 (transfer 1); N: 4; CA: 18 (transfer 2)	315
	3D NCACX	8	14	2	t3: 15.0; t2: 8.0; t1: 7.9	w3: 52.6; w2: 3.5; w1: 2.8	100	50	HN: 1.00; NC: 1.50	H: 54; N: 40 (transfer 1); N: 4; CA: 18 (transfer 2)	315
	3D NCOCX	8	14	2	t3: 15.0; t2: 8.0; t1: 7.9	w3: 52.6; w2: 3.5; w1: 2.8	100	50	HN: 1.00; NC: 1.50	H: 54; N: 40 (transfer 1); N: 8.4; CA: 5.6 (transfer 2)	315
	3D CANCOCX	64	14	2	t3: 17.4; t2: 7.9; t1: 6.0	w3: 58.8; w2: 2.8; w1: 4.7	100	50	HC: 1.20; CN: 1.25; NC: 7.00	H: 69; CA: 55 (transfer 1); CA: 3; N: 11 (transfer 2); N: 8.4; CO: 5.6 (transfer 3)	315
	2D CORD	4	14	2	t2: 20; t1: 17	w2: 44.2; w1: 35	100	5, 20, 100, 500	HC: 1.75	H: 69 ; C: 55	315
	hC	55kHz on 13C	69 kHz on 1H	tc = 1750 us
	hN	40kHz on 15N	54 kHz on 1H	tc = 1000 us
	hNCA	hN		NCA
		H	N 4	C 18
	NCO	hN		NCO
	CAN	hCA		CAN		NCO	8.4 kHz on 15N	5.6 kHz on 13C	DQ (sum=14kHz)
