# Supplementary material for: Structural Basis for the Assembly of Amyloid Fibrils by the Master Cell-Signaling Regulator Human Receptor-Interacting Protein Kinase 1
Source: Research Square preprint supplement (doi:10.21203/rs.3.rs-5820237/v1), 2025-01-24
Supplement: Supplementary file 3 [file aef2dda19550793ea77b682e.xlsx]

## Sheet: Sheet1
	Statistic description		Value
	Total distance restraints		121
		Intra-residue (|i-j|=0)	4
		Sequential (|i-j|=1)	44
		Medium range (|i-j|>1 and |i-j|<5)	48
		Long range (|i-j>̲ 5)	25
		Total dihedral-angle restraints	35
		Number of restraints per residue	7.1
		Number of long range restraints per residue	1.1
