# Supplementary material for: Structural Basis for the Assembly of Amyloid Fibrils by the Master Cell-Signaling Regulator Human Receptor-Interacting Protein Kinase 1
Source: Research Square preprint supplement (doi:10.21203/rs.3.rs-5820237/v1), 2025-01-24
Supplement: Supplementary file 4 [file c88a3ea5f0557ebb0e9a1912.xlsx]

## Sheet: Sheet1
	Unambiguous restraints
	Residue 1	Residue 1 type	Atom 1 type	Residue 2	Residue 2 type	Atom 2 type
	532	THR	C	541	ILE	CD	*
	536	SER	CA	538	GLY	CA	*
	536	SER	CB	538	GLY	CA	*
	538	GLY	CA	550	GLY	CA	*
	538	GLY	CA	547	MET	CG	*
	538	GLY	CA	547	MET	CE	*
	538	GLY	C	547	MET	CE	*
	540	GLN	CG	545	ASN	CB	*
	540	GLN	CG	547	MET	CE	*
	540	GLN	CD	547	MET	CE	*
	542	GLY	CA	545	ASN	CA	*
	543	ALA	CB	545	ASN	CB
	Ambiguous restraints
	Residue 1	Residue 1 type	Atom 1 type	Residue 2	Residue 2 type	Atom 2 type
	533	ILE	CA	536	SER	CB
	533	ILE	CB	536	SER	CB
	533	ILE	CG1	536	SER	CB	**
	533	ILE	CG2	536	SER	CB	**
	533	ILE	CD	536	SER	CB	**
	533	ILE	CD	536	SER	CA	**
	535	ASN	CA	537	THR	CB
	536	SER	CA	539	ILE	CG1	**
	536	SER	CB	539	ILE	CA
	536	SER	CB	539	ILE	CB
	536	SER	CB	539	ILE	CG1	**
	536	SER	CB	539	ILE	CG2	**
	537	THR	CA	535	ASN	CA
	537	THR	CB	535	ASN	CA
	537	THR	CA	539	ILE	CG1
	537	THR	CB	539	ILE	CG1
	537	THR	CA	539	ILE	CD
	537	THR	CB	539	ILE	CD
	537	THR	CG	539	ILE	CD
	537	THR	CB	550	GLY	CA
	537	THR	CG	550	GLY	CA	**
	537	THR	CB	549	ILE	CB
	537	THR	CB	549	ILE	CG2
	537	THR	CG	549	ILE	CG2
	537	THR	CG	550	ILE	CD
	538	GLY	CA	540	GLN	CA
	538	GLY	CA	540	GLN	CB
	538	GLY	CA	540	GLN	CG
	538	GLY	CA	547	MET	CA
	538	GLY	CA	547	MET	CB
	538	GLY	CA	549	ILE	CG2
	540	GLN	CA	542	GLY	CA
	540	GLN	CA	547	MET	CE	**
	540	GLN	CB	547	MET	CE	**
	542	GLY	CA	544	TYR	CA
	542	GLY	CA	545	ASN	CB	**
	545	ASN	CA	547	MET	CE
	546	TYR	CB	548	GLU	CB
	547	MET	CA	549	ILE	CD
	In light green: restraints between nuclei that are 2 residues apart in the sequence
	In dark green: restraints between residues that are 3 or more residues apart in the sequence
	* Distance restraints used in first structure calculation
	** Low ambiguity restraints between nuclei that are 3 or more residues apart
	and that can be resolved based on the preliminary model
